# Supplementary material for: Safety and convenience of once-weekly somapacitan in adult GH deficiency: a 26-week randomized, controlled trial
Source: PubMed Central journal article supplement (PMC5920019; doi:10.1530/eje-17-1073), 2018-02-26

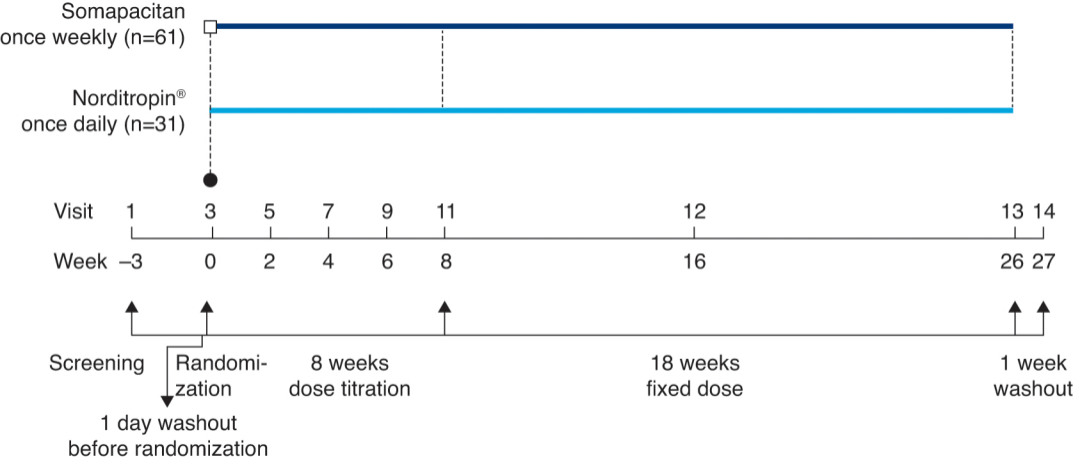

Supplement: eje-178-491-s001.pdf [file eje-178-491-s001.pdf]
