# Supplementary material for: Safety and convenience of once-weekly somapacitan in adult GH deficiency: a 26-week randomized, controlled trial
Source: PubMed Central journal article supplement (PMC5920019; doi:10.1530/eje-17-1073), 2018-02-26
Supplement: eje-178-491-t002.pdf [file eje-178-491-t002.pdf]

**Supplementary Table 2. Summary of Treatment Satisfaction Questionnaire for Medication (TSQM-9) scores by visit: full analysis set.**

|                                             | Effectiveness |             | Convenience |             | Global satisfaction |             |
|---------------------------------------------|---------------|-------------|-------------|-------------|---------------------|-------------|
|                                             | Somapacitan   | Norditropin | Somapacitan | Norditropin | Somapacitan         | Norditropin |
| <b>FAS, N</b>                               | <b>61</b>     | <b>31</b>   | <b>61</b>   | <b>31</b>   | <b>61</b>           | <b>31</b>   |
| <b>Baseline</b>                             |               |             |             |             |                     |             |
| N                                           | 56            | 31          | 58          | 31          | 57                  | 31          |
| Mean (SD)                                   | 69.3 (17.7)   | 71.0 (21.7) | 68.3 (18.3) | 71.7 (17.5) | 70.4 (20.1)         | 74.8 (18.5) |
| <b>Week 26</b>                              |               |             |             |             |                     |             |
| N                                           | 58            | 28          | 58          | 28          | 58                  | 28          |
| Mean (SD)                                   | 77.9 (15.9)   | 75.6 (20.1) | 83.8 (12.9) | 75.8 (19.1) | 76.4 (19.3)         | 75.0 (19.8) |
| <b>Change in score (Week 26 – baseline)</b> |               |             |             |             |                     |             |
| N                                           | 53            | 28          | 55          | 28          | 54                  | 28          |
| Mean (SD)                                   | 9.7 (18.1)    | 3.8 (27.4)  | 15.3 (20.9) | 3.0 (16.5)  | 5.4 (21.0)          | -1.2 (15.2) |

Observed values. FAS, full analysis set
